# Supplementary material
Source: PubMed Central journal article supplement (PMC4159678)

527 **Supplemental data**

528 **Supplemental Table 1. PFOS perturbed top toxicity pathways**

| Name                                                                         | P-value  | Ratio          |
|------------------------------------------------------------------------------|----------|----------------|
| Mechanism of gene regulation by peroxisome proliferators via PPAR $\alpha$   | 7.54E-05 | 11/95 (0.116)  |
| Decreases transmembrane potential of mitochondria and mitochondrial membrane | 1.18E-04 | 12/117 (0.103) |
| Cardiac hypertrophy                                                          | 3.44E-04 | 23/368 (0.062) |
| Cardiac necrosis/cell death                                                  | 1.91E-03 | 16/248 (0.065) |
| Decreases depolarization of mitochondria and mitochondrial membrane          | 2.13E-03 | 4/20 (0.2)     |

529

530

531 **Supplemental Fig. 1** PFOS-perturbed the canonical pathway PPAR signaling. Genes  
532 include insulin receptor substrate (*irs*), achaete (*ac*), cAMP-dependent protein kinase (*pka*),  
533 protein kinase C (*pkc*), 5-AMP-activated protein kinase (*ampk*), janus kinase 2 (*jak2*),  
534 TGFbeta-recepte (*tgfbr*), mitogen-activated protein kinase (*erk1/2*), acetoin catabolism  
535 protein (*acox*) were upregulated and nuclear receptor coactivator (*ncoa*), aryl-hydrocarbon  
536 receptor-interacting protein (*xap2*), integrin, beta 5 (*itgb5*), and sarcoplasmic  
537 calcium-binding protein (*cbp*) were downregulated.

# Supplemental Fig. 1

PPAR Signaling

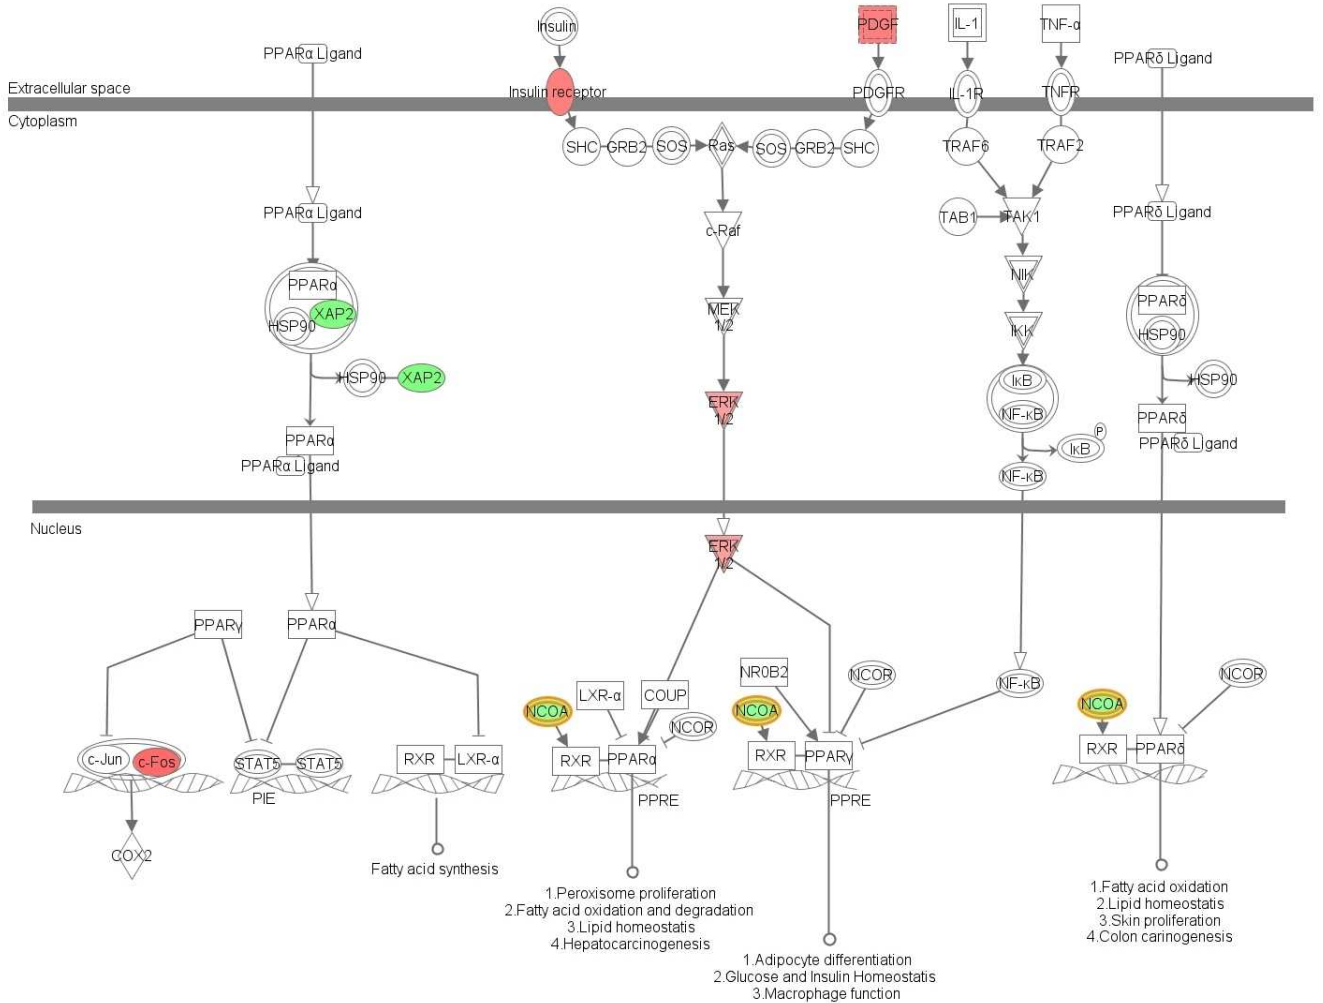

Supplement: NIHMS614887-supplement-01.pdf [file NIHMS614887-supplement-01.pdf]
